# Supplementary material for: Fetal–neonatal and maternal pregnancy outcomes in women with rheumatoid arthritis: a population-based cohort study
Source: HighWire-hosted journal article supplement (doi:10.1136/bmjopen-2021-059203), 2022-10-01
Supplement: bmjopen-2021-059203supp002_data_supplement.pdf [file bmjopen-2021-059203supp002_data_supplement.pdf]

Supplementary Table 1. Disease definitions

| <b>Disease definition</b>                    |                                                                                                                                  |
|----------------------------------------------|----------------------------------------------------------------------------------------------------------------------------------|
| Delivery                                     | DRG code: 0371A, 0371a, 0373B, 0373b, 0373A, 0373a, 0373C, 0373c<br>ICD-9 CM code: V27, 650, 651, 652<br>ICD-op-code: 72, 73, 74 |
| <b>Cardiovascular complications</b>          |                                                                                                                                  |
| Acute myocardial                             | 410.xx                                                                                                                           |
| Aneurysm                                     | 441.xx                                                                                                                           |
| Cardiac arrest/ ventricular fibrillation     | 427.41, 427.42, 427.5                                                                                                            |
| Heart failure                                | 669.4x, 997.1                                                                                                                    |
| Shock                                        | 669.1x, 785.5x                                                                                                                   |
| Conversion of cardiac rhythm                 | 99.6x                                                                                                                            |
| Pregnancy-related hypertension               | 642.3x 642.9x 642.4x 642.5x 642.6x<br>642.7x                                                                                     |
| Preeclampsia                                 | 642.4x 642.5x 642.6x 642.7x                                                                                                      |
| Eclampsia                                    | 642.6x                                                                                                                           |
| Gestational hypertension                     | 642.3x 642.9x                                                                                                                    |
| Puerperal cerebrovascular disorders          | 430, 431, 432.x, 433.xx, 434.xx, 436,<br>437.x, 671.5x, 674.0x, 997.2, 999.2                                                     |
| Thrombotic embolism                          | 415.1x, 673.0x, 673.2x, 673.3x,<br>673.8x,                                                                                       |
| <b>Events and procedures during delivery</b> |                                                                                                                                  |
| Amniotic fluid embolism                      | 673.1x                                                                                                                           |

|                                             |                                                                                    |
|---------------------------------------------|------------------------------------------------------------------------------------|
| Antepartum hemorrhage                       | 641.1x 641.2x 641.3x 641.8x 641.9x                                                 |
| Postpartum hemorrhage due to atony          | 666.1x                                                                             |
| Postpartum hemorrhage not due to atony      | 666.0x 666.2x 666.3x                                                               |
| Severe postpartum hemorrhage                | [666.0x-666.3x] plus either blood transfusion [99.0x] or hysterectomy [68.3x-68.9] |
| Premature rupture of membranes              | 658.1x                                                                             |
| Chorioamnionitis                            | 658.4x                                                                             |
| Cesarean delivery                           | Birth Registration                                                                 |
| <b>Events and procedures during surgery</b> |                                                                                    |
| Severe anesthesia complications             | 668.0x, 668.1x, 668.2x                                                             |
| Thorax, abdomen, and pelvis injuries        | 860.xx-869.xx                                                                      |
| Intracranial injuries                       | 800.xx, 801.xx, 803.xx, 804.xx,<br>851.xx, 854.xx                                  |
| Blood transfusion                           | 99.0x                                                                              |
| Hysterectomy                                | 68.3x-68.9                                                                         |
| Operations on heart and pericardium         | 35.xx, 36.xx, 37.xx, 39.xx                                                         |
| <b>Other</b>                                |                                                                                    |
| Acute renal failure                         | 584.x, 669.3x                                                                      |
| Adult respiratory distress syndrome         | 518.5, 518.81, 518.82, 518.84, 799.1                                               |
| Sepsis                                      | 038.xx, 995.91, 995.92                                                             |
| Disseminated intravascular coagulation      | 286.6, 286.9, 666.3x                                                               |
| pulmonary edema                             | 428.1, 518.4                                                                       |
| Temporary tracheostomy                      | 31.1                                                                               |

|                                                               |                                                            |
|---------------------------------------------------------------|------------------------------------------------------------|
| Ventilation                                                   | 93.90, 96.01-96.05, 96.7x                                  |
| Gestational diabetes                                          | 648.8x                                                     |
| Low birth weight                                              | Birth Registration, <2500 g                                |
| Preterm maturity                                              | Birth Registration, <37 week                               |
| Fetal distress                                                | 656.3x, 659.7x                                             |
| Fetal abnormalities, any                                      | Birth Registration + inpatient claim data (ICD-9 (655.xx)) |
| Central nervous system malformations                          | 655.0x                                                     |
| Chromosomal abnormalities                                     | 655.1x                                                     |
| Hereditary disease in family possible affecting fetus         | 655.2                                                      |
| Suspected damage due to viral or other diseases in the mother | 655.3x 655.4x                                              |
| Suspected damage due to drugs or radiation                    | 655.5x 655.6x                                              |
| Decreased fetal movements                                     | 655.7x                                                     |
| Other/unspecified abnormalities                               | 655.8x 655.9x                                              |
| Stillbirth                                                    | Birth Registration                                         |

Abbreviations: DRG, Diagnosis Related Groups; ICD, International Classification of

Diseases
